# Supplementary material for: TGF-β1 Drives Inflammatory Th Cell But Not Treg Cell Compartment Upon Allergen Exposure
Source: PubMed Central journal article supplement (PMC8777012; doi:10.3389/fimmu.2021.763243), 2022-01-07

FigureS1

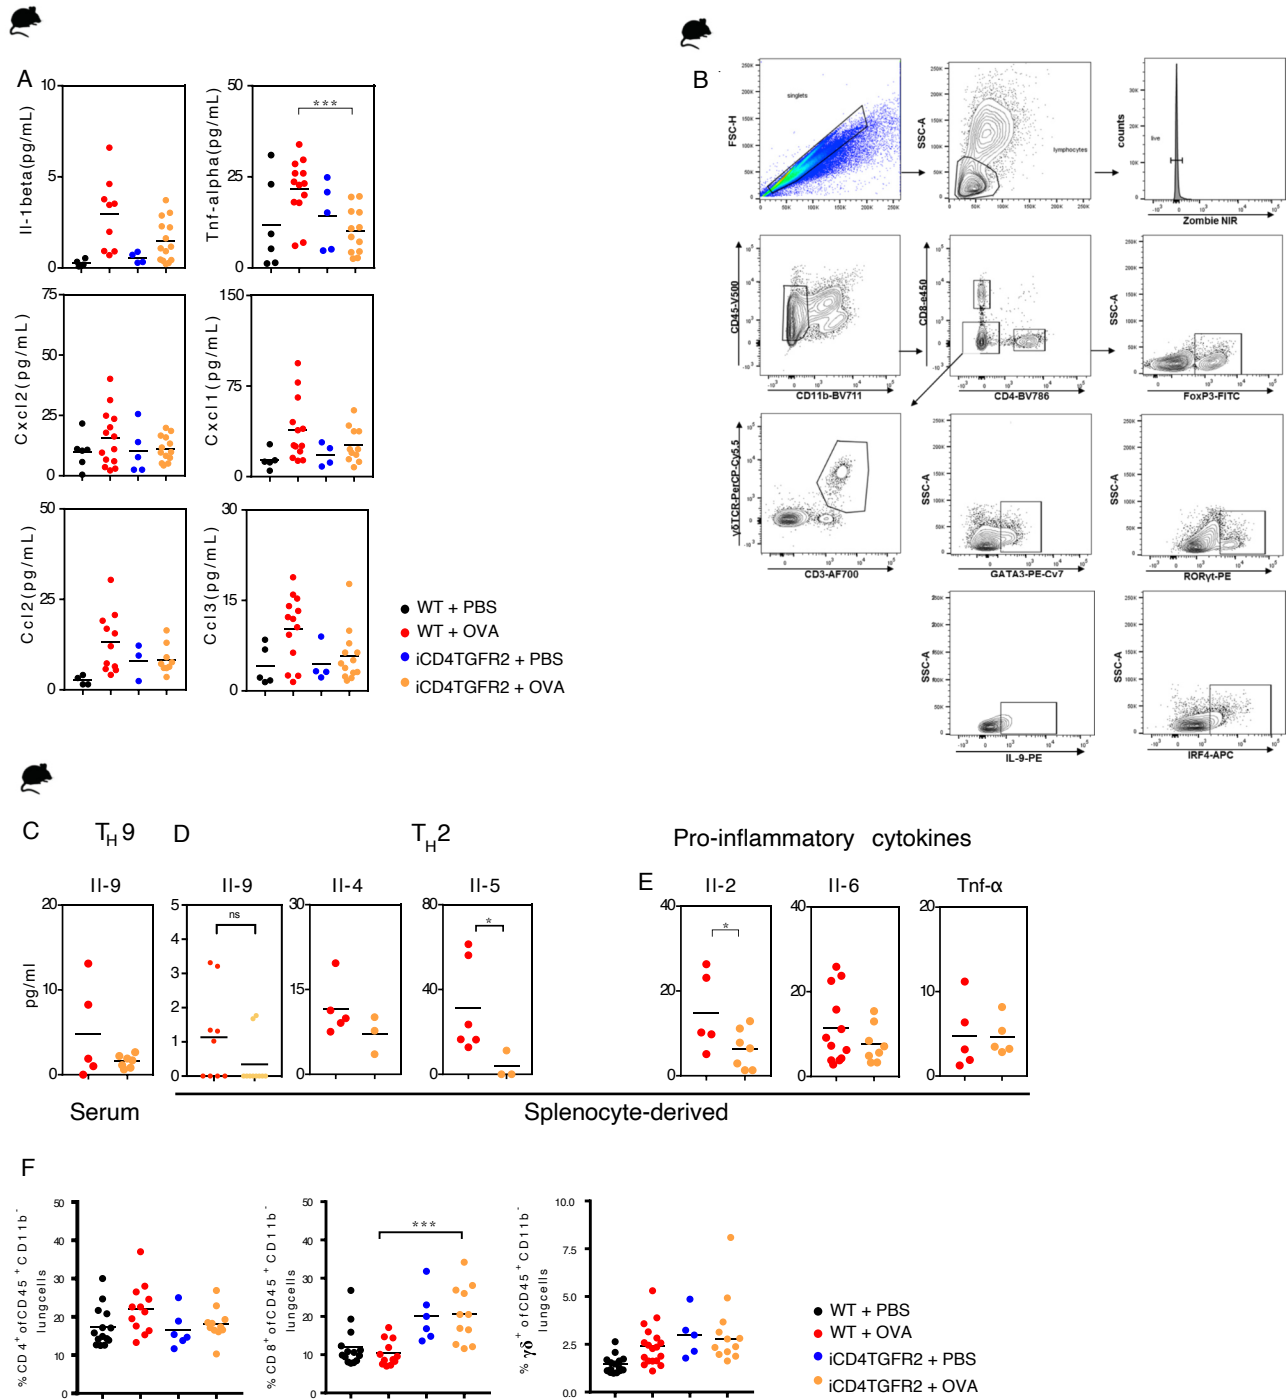

Supplement: DataSheet_1.pdf [file DataSheet_1.pdf]
