# Supplementary material for: TGF-β1 Drives Inflammatory Th Cell But Not Treg Cell Compartment Upon Allergen Exposure
Source: PubMed Central journal article supplement (PMC8777012; doi:10.3389/fimmu.2021.763243), 2022-01-07

Figure S2

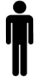

Sputum cytokine levels out of grass pollen season (October–January)

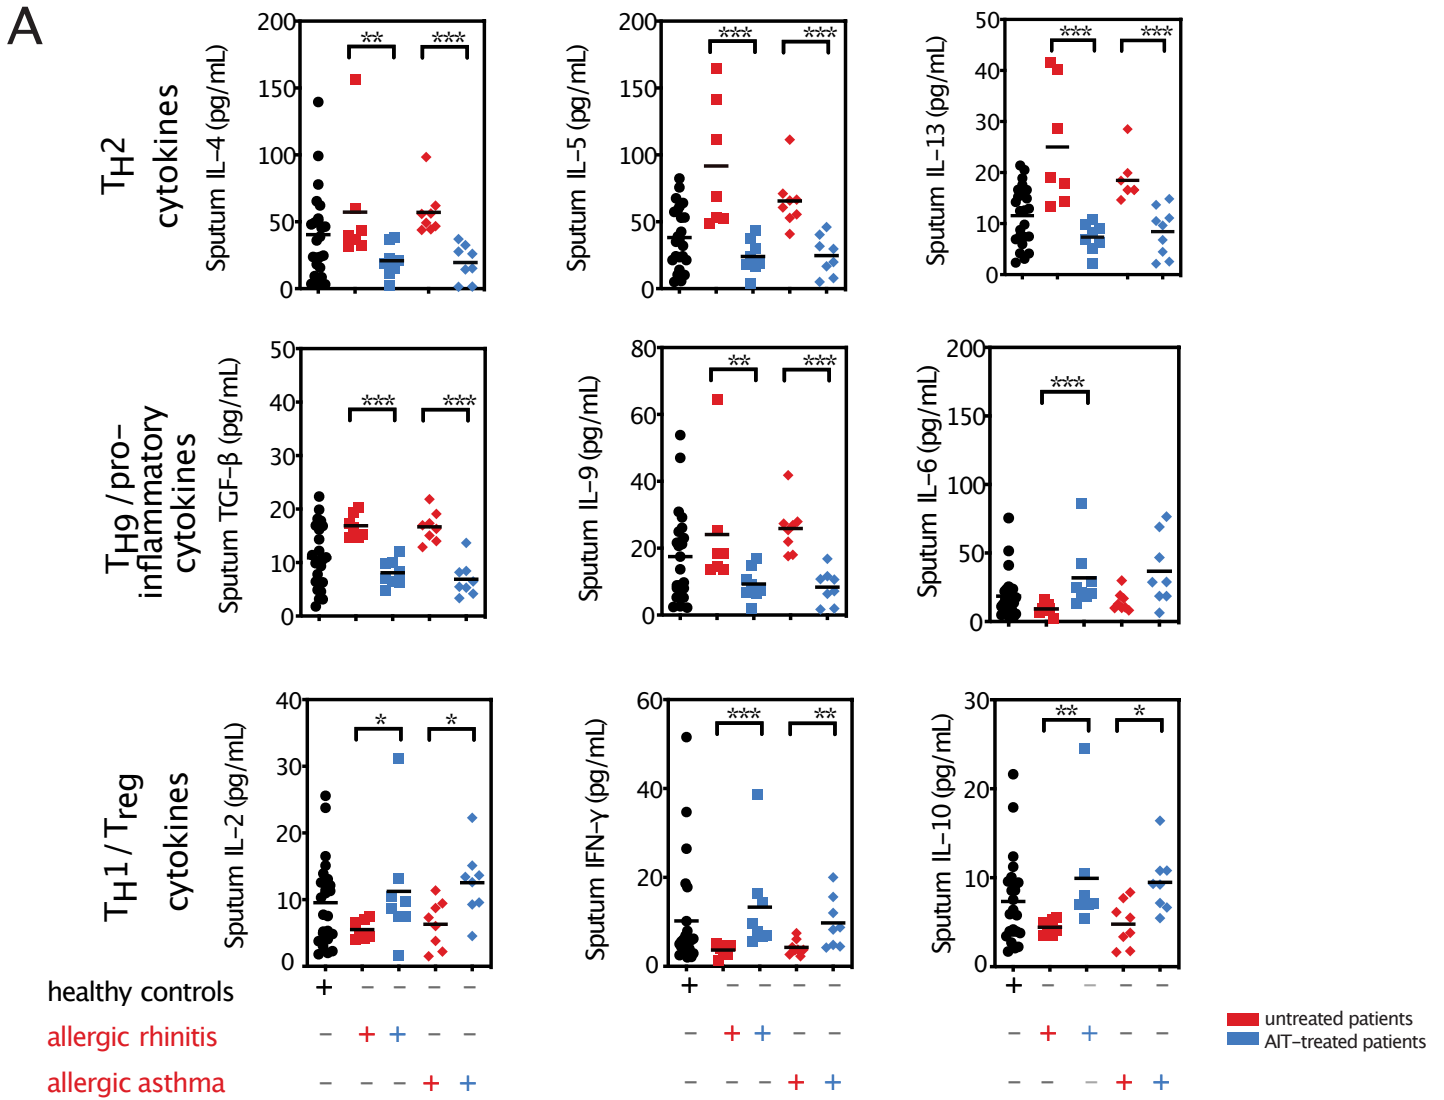

**B** Gating strategy for TH2, TH9 and regulatory T cells in peripheral blood

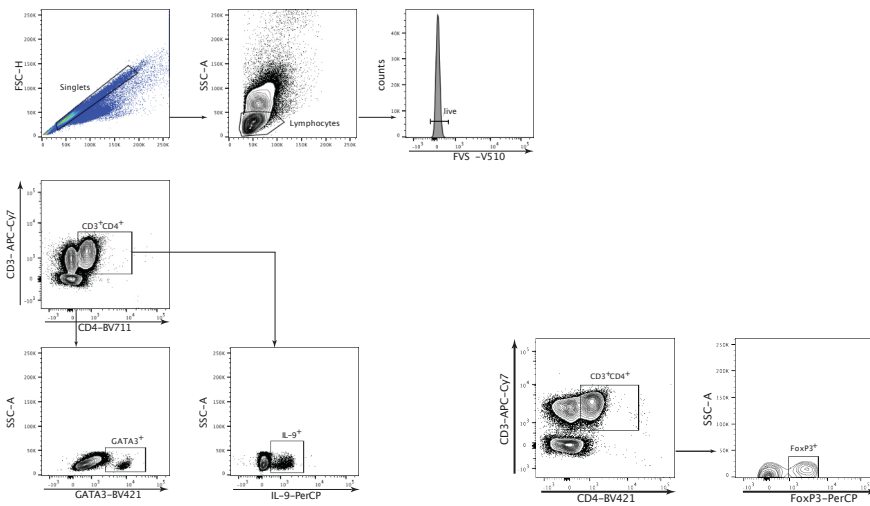

Supplement: DataSheet_2.pdf [file DataSheet_2.pdf]
