# Supplementary material for: TGF-β1 Drives Inflammatory Th Cell But Not Treg Cell Compartment Upon Allergen Exposure
Source: PubMed Central journal article supplement (PMC8777012; doi:10.3389/fimmu.2021.763243), 2022-01-07
Supplement: DataSheet_3.pdf [file DataSheet_3.pdf]

## Supplementary Tables

**Table S1. Cytokine levels in murine BALF.**

|                           | WT +PBS<br>(n=3-6) | WT +OVA<br>(n=8-15) | iCD4TGFBR2<br>+PBS (n=3-6) | iCD4TGFBR2<br>+OVA<br>(n=7-15) |
|---------------------------|--------------------|---------------------|----------------------------|--------------------------------|
| IL-4 (pg/mL)              | 0.11±0.03***       | 25.0 ±5.3           | 0.38±0.06***               | 11.1±3.4##                     |
| IL-5 (pg/mL)              | 3.77±1.3****       | 54.0±8.2            | 2.7±0.9***                 | 28.1±5.5#                      |
| IL-13 (pg/mL)             | 0.02±0.001**       | 10.0±2.8            | 0.01±0.002*                | 9.9±4.0                        |
| TGFβ <sub>1</sub> (pg/mL) |                    |                     |                            |                                |
| IL-9 (pg/mL)              | 0.2±0.1****        | 6.8±1.3             | 0.1±0.05**                 | 3.0±1.0#                       |
| IL-6 (pg/mL)              | 6.0±1.6***         | 45.1±8.5            | 10.8±1.3                   | 20.2±3.7#                      |
| IL-17A (pg/mL)            | 0.3±0.1*           | 6.4±1.3             | 0.3±0.06                   | 2.2±0.9##                      |
| TNF-α (pg/mL)             | 11.9±5.0           | 21.8±2.3            | 14.2±4.1                   | 10.2±1.8###                    |
| IL-1β (pg/mL)             | 0.3±0.1**          | 3.0±0.7             | 0.6±0.1                    | 1.5±0.3                        |
| IFN-γ (pg/mL)             | 0.03±0.001**       | 0.2±0.07            | 0.03±0.002                 | 0.1±0.06#                      |
| IL-2 (pg/mL)              | 0.3±0.1**          | 2.6±0.3             | 1.2±1.0                    | 2.31±0.5                       |
| IL-10 (pg/mL)             | 1.7±0.8*           | 6.0±1.2             | 2.7±1.1                    | 5.4±1.2                        |
| CXCL1                     | 13.9±3.6*          | 38.5±7.2            | 18.0±4.7                   | 26.4±4.4                       |
| CXCL2                     | 10.0±2.9           | 15.5±3.2            | 10.5±4.3                   | 11.2±1.5                       |
| CXCL10                    | 2.3±0.5            | 13.9±2.3            | 2.9±0.9                    | 6.3±1.2                        |
| CCL2                      | 2.6±0.6**          | 13.1±2.5            | 8.1±2.9                    | 8.4±1.3                        |
| CCL3                      | 4.2±1.5*           | 10.3±1.6            | 4.4±1.6                    | 5.7±1.3                        |

Data are presented as mean±SEM. \* indicates statistical difference compared to the respective OVA treated group. # indicates statistical difference compared to WT +OVA

**Table S2. Fluorochrome-labelled antibodies in flow cytometry analyses of murine samples**

| <b>Antigen</b>                                  | <b>Fluorochrome</b> | <b>Company</b> | <b>Clone</b> | <b>Dilution</b> |
|-------------------------------------------------|---------------------|----------------|--------------|-----------------|
| CD45                                            | V500                | BD             | 30-F11       | 1:500           |
| CD3                                             | A700                | BioLegend      | 17A2         | 1:100           |
| CD4                                             | BV785               | BioLegend      | L3T4         | 1:400           |
| CD8                                             | E450                | eBioscience    | 53-6.7       | 1:400           |
| CD11b                                           | BV711               | BioLegend      | M1/70        | 1:700           |
| dTCR                                            | PerCP-Cy5.5         | BioLegend      | GL3          | 1:300           |
| IFN $\gamma$                                    | FITC                | eBioscience    | XMG1.2       | 1:600           |
| FoxP3                                           | FITC                | eBioscience    | FJK-16s      | 1:100           |
| GATA3                                           | PE-Cy7              | eBioscience    | TWAJ         | 1:80            |
| RORc                                            | PE                  | eBioscience    | AFKJS-9      | 1:100           |
| IRF4                                            | APC                 | eBioscience    | 3EF          | 1:100           |
| IL-9                                            | PE                  | eBioscience    | RM9A4        | 1:250           |
| Zombie Aqua <sup>TM</sup> Fixable Viability Kit |                     | BioLegend      |              | 1:1000          |

**Table S3. Murine primers used for qPCR.**

| <b>Primer</b>      | <b>Sequence</b>                                              |
|--------------------|--------------------------------------------------------------|
| <i>mouse Pu.1</i>  | 5'-AGAAGCTGATGGCTTGGAGC<br>5'-TTTGTCCCTTGTCCACCCACC          |
| <i>mouse Irf4</i>  | 5'-TCCTCTGGATGGCTCCAGATGG<br>5'-CACCAAAGCACAGAGTCACCTG       |
| <i>mouse Gata3</i> | 5'-GCTAGCCCTGACGGAGTTTTTC<br>5'-AGGTGGACGTA CTTTTTAACATCG    |
| <i>mouse Foxo1</i> | 5'-ACATTTTCGTCCTCGAACCAGCTCA<br>5'-ATTTTCAGACAGACTGGGCAGCGTA |
| <i>mouse Foxo3</i> | 5'-CGCTGTGTGCCCTACTTC<br>5'-CCCGTGCCTTCATTCTGA               |
| <i>mouse Nfat5</i> | 5'-TCAGACTACCTCAACCGTTC<br>5'-TTCAGGACCAGGATCTCTTG           |
| <i>mouse Sgk1</i>  | 5'-GGCTATCTGCACTCCCTAAACA<br>5'-CCAAAGTCAGTGAGGACGATGT       |
| <i>mouse Jak1</i>  | 5'-ACGCTCCGAACCGAATCATC<br>5'-GTGCCAGTTGGTAAAGTAGAACC        |
| <i>mouse Stat6</i> | 5'-CCTGGTCGGTTCAGATGCTTT<br>5'-GTGCGGCAAGATGCTGTTTC          |
| <i>GAPDH</i>       | 5'-CGTCCCCTAGACAAAATGGT<br>5'-TTGATGGCAACAATCTCCAC           |

**Table S4. Patient characteristics & sputum cell differentiation (in season) of recruited patients.**

|                                       | Controls<br>(n=26) | Allergic rhinitis<br>w/o AIT (n=9) | Allergic rhinitis<br>with AIT (n=10) | Allergic rhinitis<br>with asthma<br>comorbidity<br>w/o AIT (n=10) | Allergic rhinitis<br>with asthma<br>comorbidity<br>with AIT (n=9) |
|---------------------------------------|--------------------|------------------------------------|--------------------------------------|-------------------------------------------------------------------|-------------------------------------------------------------------|
| Age [years]                           | 27.2±1.3           | 28.7±2.2                           | 26.4±1.6                             | 26.5±1.0                                                          | 26.0±0.7                                                          |
| Sex (m/f)                             | 11/15              | 2/7                                | 4/6                                  | 6/4                                                               | 6/3                                                               |
| GINA Score                            | n.d.               | n.d.                               | n.d.                                 | 1.1±0.4*                                                          | 0.0±0.0                                                           |
| mRQLQ Score                           | 1.2±0.2            | 2.5±0.3                            | 1.3±0.4                              | 1.1±0.4                                                           | 0.8±0.4                                                           |
| mRQLQ Score<br>activity<br>limitation | 0.1±0.1            | 1.3±0.3                            | 1.0±0.3                              | 2.0±0.3                                                           | 1.0±0.2                                                           |
| mRQLQ Score<br>practical<br>problems  | 0.1±0.0            | 3.0±0.5                            | 2.6±0.5                              | 4.0±0.3                                                           | 2.2±0.3                                                           |
| mRQLQ Score<br>nose symptoms          | 0.2±0.1            | 2.8±0.5                            | 2.3±0.5                              | 3.6±0.3                                                           | 2.6±0.3                                                           |
| mRQLQ Score<br>eye symptoms           | 0.0±0.0            | 2.0±0.5                            | 1.5±0.4                              | 3.1±0.3                                                           | 1.5±0.3                                                           |
| mRQLQ Score<br>other symptoms         | 0.3±0.1            | 1.8±0.5                            | 1.2±0.3                              | 2.9±0.3                                                           | 1.3±0.2                                                           |
| IgE [IU/L]                            | n.d.               | 147.1±48.9                         | 40.8±14.4                            | 147.3±100.1                                                       | 110.6±77.0                                                        |
| FEV1 [%]                              | 100.6±2.3          | 102.6±2.3                          | 101.9±3.7                            | 95.4±4.8                                                          | 96.5±2.3                                                          |
| FEV1 [L]                              | 3.7±0.2            | 4.2±0.3                            | 3.9±0.1                              | 3.8±0.2                                                           | 3.5±0.2                                                           |
| FVC [%]                               | 97.8±2.4           | 103.7±3.3                          | 100.4±5.1                            | 97.1±4.9                                                          | 97.9±2.9                                                          |
| FVC [L]                               | 4.4±0.2            | 4.7±0.4                            | 4.5±0.2                              | 4.5±0.3                                                           | 4.3±0.2                                                           |
| MEF25 [%]                             | 111.3±6.8          | 96.2±10.9                          | 101.4±8.0                            | 99.9±6.7                                                          | 93.1±6.5                                                          |
| MEF25 [L]                             | 2.2±0.1            | 2.2±0.4                            | 2.4±0.2                              | 2.1±0.2                                                           | 1.8±0.3                                                           |
| Total cells<br>[x10 <sup>4</sup> /mL] | 47.3±8.7           | 134.2±31.4                         | 42.8±9.3                             | 178.1±94.8                                                        | 19.6±2.9                                                          |
| Macrophages [%]                       | 84.9±3.0           | 87.0±2.0                           | 86.6±2.7                             | 80.5±6.6                                                          | 85.2±5.8                                                          |
| Neutrophils [%]                       | 14.0±3.0           | 9.5±1.4                            | 11.3±2.1                             | 15.5±4.7                                                          | 14.2±5.7                                                          |
| Eosinophils [%]                       | 0.5±0.2            | 2.6±1.0                            | 1.0±0.2                              | 2.5±1.5                                                           | 0.4±0.2                                                           |
| Lymphocytes [%]                       | 0.6±0.3            | 0.9±0.2                            | 1.1±0.1                              | 2.3±1.3                                                           | 0.2±0.2                                                           |

Data are presented as mean±SEM. GINA score was assessed in asthma patients only; \*depicts significance between allergic asthma without AIT versus allergic asthma with AIT. GINA: Global Initiative for Asthma; mRQLQ: Rhinitis quality of life mini questionnaire; IgE: Immunoglobulin E; FEV1: Forced expiratory volume in 1 second; FVC: Forced vital capacity; MEF25: Maximal expiratory flow 25%.

**Table S5. Sputum cytokine levels**

|                                  | Controls | Allergic rhinitis<br>w/o AIT | Allergic rhinitis<br>with AIT | Allergic asthma<br>w/o AIT | Allergic asthma<br>with AIT |
|----------------------------------|----------|------------------------------|-------------------------------|----------------------------|-----------------------------|
| IL-4 (pg/mL)                     | 24.8±3.4 | 66.1±8.4****                 | 14.0±2.6###                   | 51.8±11.3*                 | 14.2±2.8\$\$\$              |
| IL-5 (pg/mL)                     | 30.8±3.9 | 71.2±5.9****                 | 14.8±1.8###                   | 48.8±9.7                   | 13.6±1.7\$\$\$              |
| IL-13 (pg/mL)                    | 9.8±1.0  | 19.0±2.2***                  | 6.5±0.8###                    | 14.4±2.3                   | 5.8±0.7\$\$\$\$             |
| TGF $\beta$ <sub>1</sub> (pg/mL) | 10.2±1.4 | 13.7±1.7                     | 4.1±0.7####                   | 17.0±3.1*                  | 5.5±0.5\$\$\$               |
| IL-9 (pg/mL)                     | 13.9±1.9 | 20.6±3.1                     | 5.8±0.6###                    | 19.2±4.0                   | 4.2±0.5\$\$\$               |
| IL-6 (pg/mL)                     | 15.5±1.7 | 13.2±3.3                     | 27.1±5.0#                     | 11.4±2.6                   | 48.4±20.6\$                 |
| IFN- $\gamma$ (pg/mL)            | 6.4±0.8  | 4.0±0.5                      | 9.3±1.8##                     | 4.1±0.5                    | 11.8±3.5\$                  |
| IL-2 (pg/mL)                     | 7.8±1.0  | 4.1±0.4                      | 10.5±1.9#                     | 3.2±0.3*                   | 8.8±1.8\$                   |
| IL-10 (pg/mL)                    | 6.0±0.7  | 3.7±0.6                      | 7.4±1.2##                     | 3.3±0.3*                   | 6.6±1.3\$                   |

Data are presented as mean±SEM. \* indicates statistical significance compared to control subjects; # indicates statistical significance compared to untreated rhinitis patients; \$ indicates statistical significance compared to untreated allergic asthma patients.

**Table S6. Fluorochrome-labelled antibodies in flow cytometry analyses of human samples**

| Antigen | Fluorochrome | Company     | Clone    | Dilution |
|---------|--------------|-------------|----------|----------|
| CD3     | APC-Cy7      | BioLegend   | HIT3     | 1:200    |
| CD4     | BV421        | BD          | RPA-T4   | 1:200    |
| CD4     | BV711        | BioLegend   | OKT-04   | 1:200    |
| TGFBR2  | PE           | R&D         | 25508    | 1:200    |
| IL-9    | eFluor710    | eBioscience | MH9D1    | 1:100    |
| FoxP3   | PerCP-Cy5.5  | eBioscience | PCH101   | 1:50     |
| GATA3   | BV421        | BioLegend   | 16E10A23 | 1:50     |
| FVS510  | HV510        | BioLegend   |          | 1:1000   |
