# Supplementary material for: TGF-β1 Drives Inflammatory Th Cell But Not Treg Cell Compartment Upon Allergen Exposure
Source: PubMed Central journal article supplement (PMC8777012; doi:10.3389/fimmu.2021.763243), 2022-01-07
Supplement: DataSheet_4.pdf [file DataSheet_4.pdf]

Online supporting information

### Legends for supplementary Figures.

#### **Figure S1. Analysis of cytokines and chemokines in the soluble BALF compartment, serum, and supernatant of restimulated splenocytes.**

**(A)** Proinflammatory cytokines and chemokines were measured in BAL fluid by chemiluminescence assay (Mesoscale) of non-allergic WT (WT+PBS) and iCD4TGFR2 (iCD4TGFR2+PBS) and allergic WT (WT+OVA) and iCD4TGFR2 (iCD4TGFR2+OVA). Each data point represents an individual mouse. Data is compiled from one or two independent experiments (n=5-15/group). **(B)** Gating strategy to analyze the effect of OVA-induced AAI on different T cell subsets in the lung. Flow cytometric analysis of lungs was performed 24h after the last OVA-challenge of non-allergic and allergic WT and iCD4TGFR2 mice. Representative gating strategy for TH2, TH9, TH17 and Treg cells. **(C)** Levels of Il-9 were measured in the serum via ELISA. **(D-E)** Splenocyte-derived Il-9, Il-4 and Il-5 and levels of pro-inflammatory cytokines Il-2, Il-6, and TNF- $\alpha$  were measured by LegendPlex®. Each data point represents an individual mouse. Data is compiled from one to two independent experiments (n=5-12/group). **(F)** Flow cytometric analysis of lungs was performed 24h after the last OVA-challenge in non-allergic WT+PBS and iCD4TGFR2+PBS mice and allergic WT+OVA and iCD4TGFR2+OVA mice. Cells were pregated on single cells/live-dead/CD45+CD11b-. Each data point represents an individual mouse. Data is compiled from two independent experiments (n=6-13/group).

\*\*p<0.01, \*\*\*p<0.001 (two-tailed Mann-Whitney U test).

**Figure S2.** Levels of selected cytokines in sputum of treated and untreated AR and AA patients and healthy controls out of grass-pollen season (October-January). **(A)** Levels of secreted cytokines IL-4, IL-5, IL-13, TGF- $\beta$ , IL-9, IL-6, IL-2, IFN- $\gamma$  and IL-10 detected in sputum supernatants of the depicted groups assessed by LEGENDplex. Data presented by individual values and mean. \* $p < 0.05$ , \*\* $p < 0.01$ , \*\*\* $p < 0.001$ , \*\*\*\* $p < 0.0001$ ; Initially, statistical significances were assessed using a Kruskal-Wallis test and only when medians across patient groups varied significantly, multiple single comparisons were performed using two-tailed Mann-Whitney U tests. **(B)** Gating strategy for Th2, Th9, and Treg cells in peripheral blood.
